# Supplementary material
Source: PubMed Central journal article supplement (PMC8262620)

**Disclosure Purpose:** 21-08861

### Summary of Interests

I do not have any interests to disclose at this time.

### Additional Questions:

- Are there other relationships or activities that readers could perceive to have influenced, or that give the appearance of potentially influencing, what you wrote in the submitted work?**  
No.
- What is the manuscript title?**  
Immunogenicity of Three-Doses of Anti-SARS-CoV-2 Messenger RNA-Based Vaccines in Solid-Organ-Transplant Recipients
- Are you the corresponding author?**  
No.

### Certification

I certify that the information provided in this disclosure is complete and accurate.

**Disclosure Purpose:** 21-08861

**Summary of Interests**

I do not have any interests to disclose at this time.

**Additional Questions:**

- 1. **Are there other relationships or activities that readers could perceive to have influenced, or that give the appearance of potentially influencing, what you wrote in the submitted work?**  
No.
- 2. **What is the manuscript title?**  
Immunogenicity of three-doses of anti-SARS-CoV-2 messenger RNA-Based Vaccines in solid-organ-transplant recipients
- 3. **Are you the corresponding author?**  
No.

**Certification**

I certify that the information provided in this disclosure is complete and accurate.

**Disclosure Purpose:** 21-08861

### Summary of Interests

I do not have any interests to disclose at this time.

### Additional Questions:

- Are there other relationships or activities that readers could perceive to have influenced, or that give the appearance of potentially influencing, what you wrote in the submitted work?**  
No.
- What is the manuscript title?**  
Immunogenicity of Three-Doses of Anti-SARS-CoV-2 Messenger RNA-Based Vaccines in Solid-Organ-Transplant Recipients
- Are you the corresponding author?**  
No.

### Certification

I certify that the information provided in this disclosure is complete and accurate.

**Disclosure Purpose:** 21-08861

### Summary of Interests

I do not have any interests to disclose at this time.

### Additional Questions:

- Are there other relationships or activities that readers could perceive to have influenced, or that give the appearance of potentially influencing, what you wrote in the submitted work?**  
No.
- What is the manuscript title?**  
Immunogenicity of three-doses of anti-SARS-CoV-2 messenger RNA-Based Vaccines in solid-organ-transplant recipients
- Are you the corresponding author?**  
No.

### Certification

I certify that the information provided in this disclosure is complete and accurate.

Disclosure Purpose: 21-08861

## Summary of Interests

### Company or Organization

| Entity                                                                                  | Type       | Interest Held By                                                                                        |
|-----------------------------------------------------------------------------------------|------------|---------------------------------------------------------------------------------------------------------|
| <a href="#">AstraZeneca</a>                                                             | Consultant | Self                                                                                                    |
| <i>Category:</i> Consultant<br><i>Additional Information:</i> One single advisory board |            | <i>Description:</i> Discussing a study aiming to determine comorbidities in patients given dapaglifozin |
| <a href="#">Biotest Pharmaceuticals Corporation</a>                                     | Consultant | Self                                                                                                    |
| <i>Category:</i> Consultant<br><i>Additional Information:</i> 4 hours every 3 months    |            | <i>Description:</i>                                                                                     |
| <a href="#">Merck</a>                                                                   | Consultant | Self                                                                                                    |
| <i>Category:</i> Consultant<br><i>Additional Information:</i>                           |            | <i>Description:</i> Discussing unmet need for CMV prophylaxis                                           |
| <a href="#">Novartis</a>                                                                | Consultant | Self                                                                                                    |
| <i>Category:</i> Consultant<br><i>Additional Information:</i> 3 hours every 2 months    |            | <i>Description:</i>                                                                                     |
| <a href="#">Takeda California, Inc.</a>                                                 | Consultant | Self                                                                                                    |
| <i>Category:</i> Consultant<br><i>Additional Information:</i>                           |            | <i>Description:</i> Discussing resistant CMV                                                            |

### Additional Questions:

- Are there other relationships or activities that readers could perceive to have influenced, or that give the appearance of potentially influencing, what you wrote in the submitted work?  
No.
- What is the manuscript title?  
Immunogenicity of Three-Doses of Anti-SARS-CoV-2 Messenger RNA-Based Vaccines in Solid-Organ-Transplant Recipients
- Are you the corresponding author?  
Yes.
  - Please list the other authors' names here.  
Nassim Kamar MD PhD, Florence Abravanel Pharm D PhD, Olivier Marion MD, Chloé Couat MSc, Jacques Izopet Pharm D PhD, Arnaud Del Bello MD

### Certification

I certify that the information provided in this disclosure is complete and accurate.

**Disclosure Purpose:** 21-08861

**Summary of Interests**

I do not have any interests to disclose at this time.

**Additional Questions:**

- 1. **Are there other relationships or activities that readers could perceive to have influenced, or that give the appearance of potentially influencing, what you wrote in the submitted work?**  
No.
- 2. **What is the manuscript title?**  
Immunogenicity of Three-Doses of Anti-SARS-CoV-2 Messenger RNA-Based Vaccines in Solid-Organ-Transplant Recipients
- 3. **Are you the corresponding author?**  
No.

**Certification**

I certify that the information provided in this disclosure is complete and accurate.

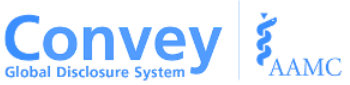

Supplement: NEJMc2108861_disclosures.pdf [file NEJMc2108861_disclosures.pdf]
